# Supplementary figures and images for: Engineering Urban Mobility: A Strategic Framework for Tram Route Design
Source: Research Square preprint supplement (doi:10.21203/rs.3.rs-7101531/v1), 2025-07-24

**GRAPHİCAL ABSTRACT**


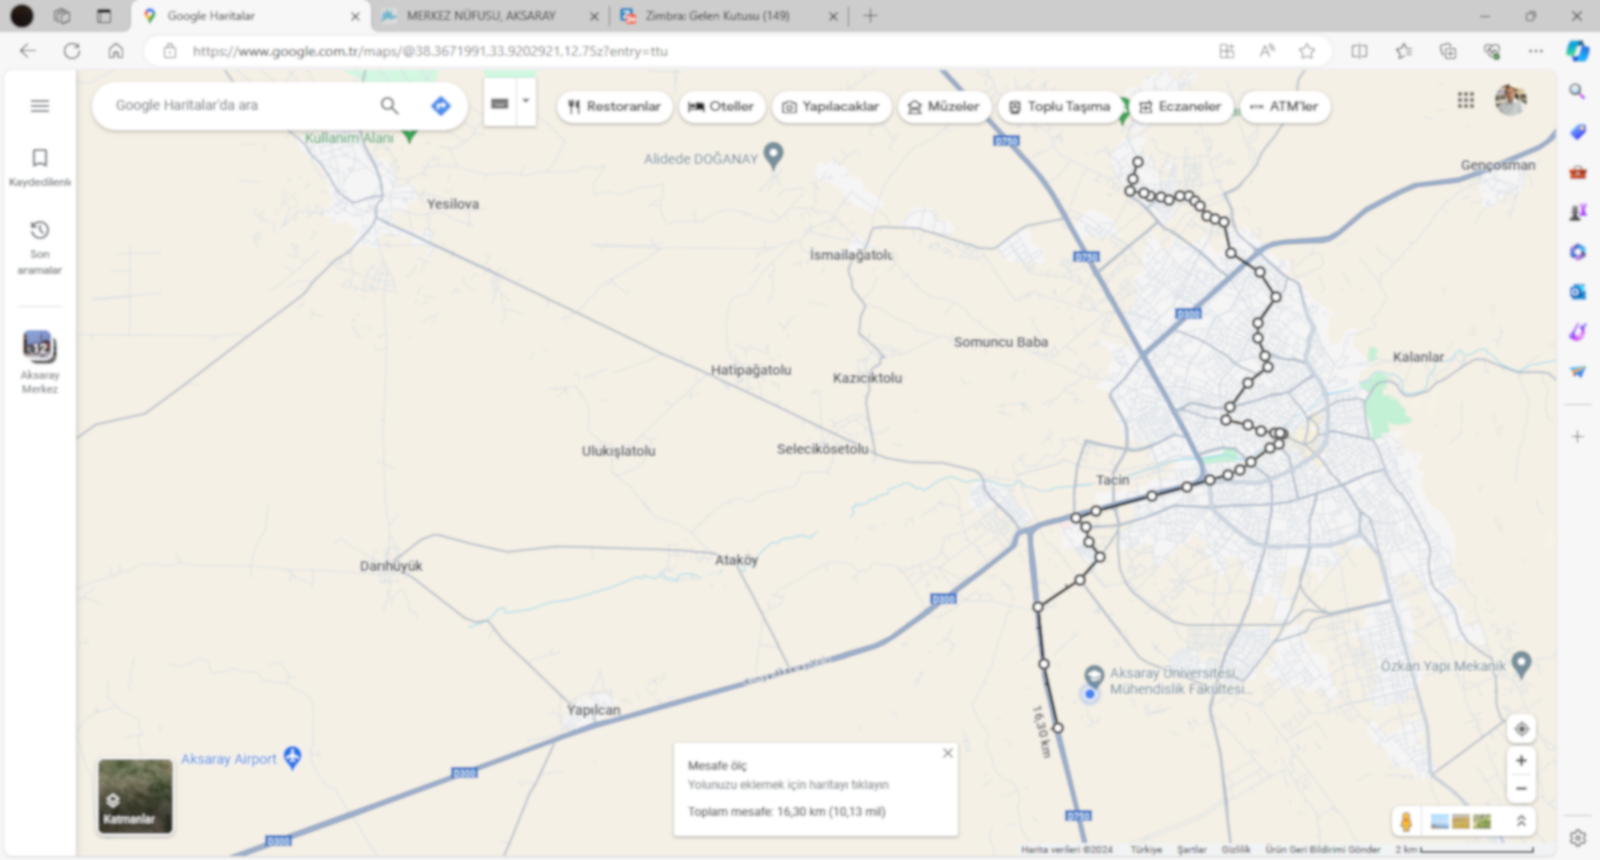

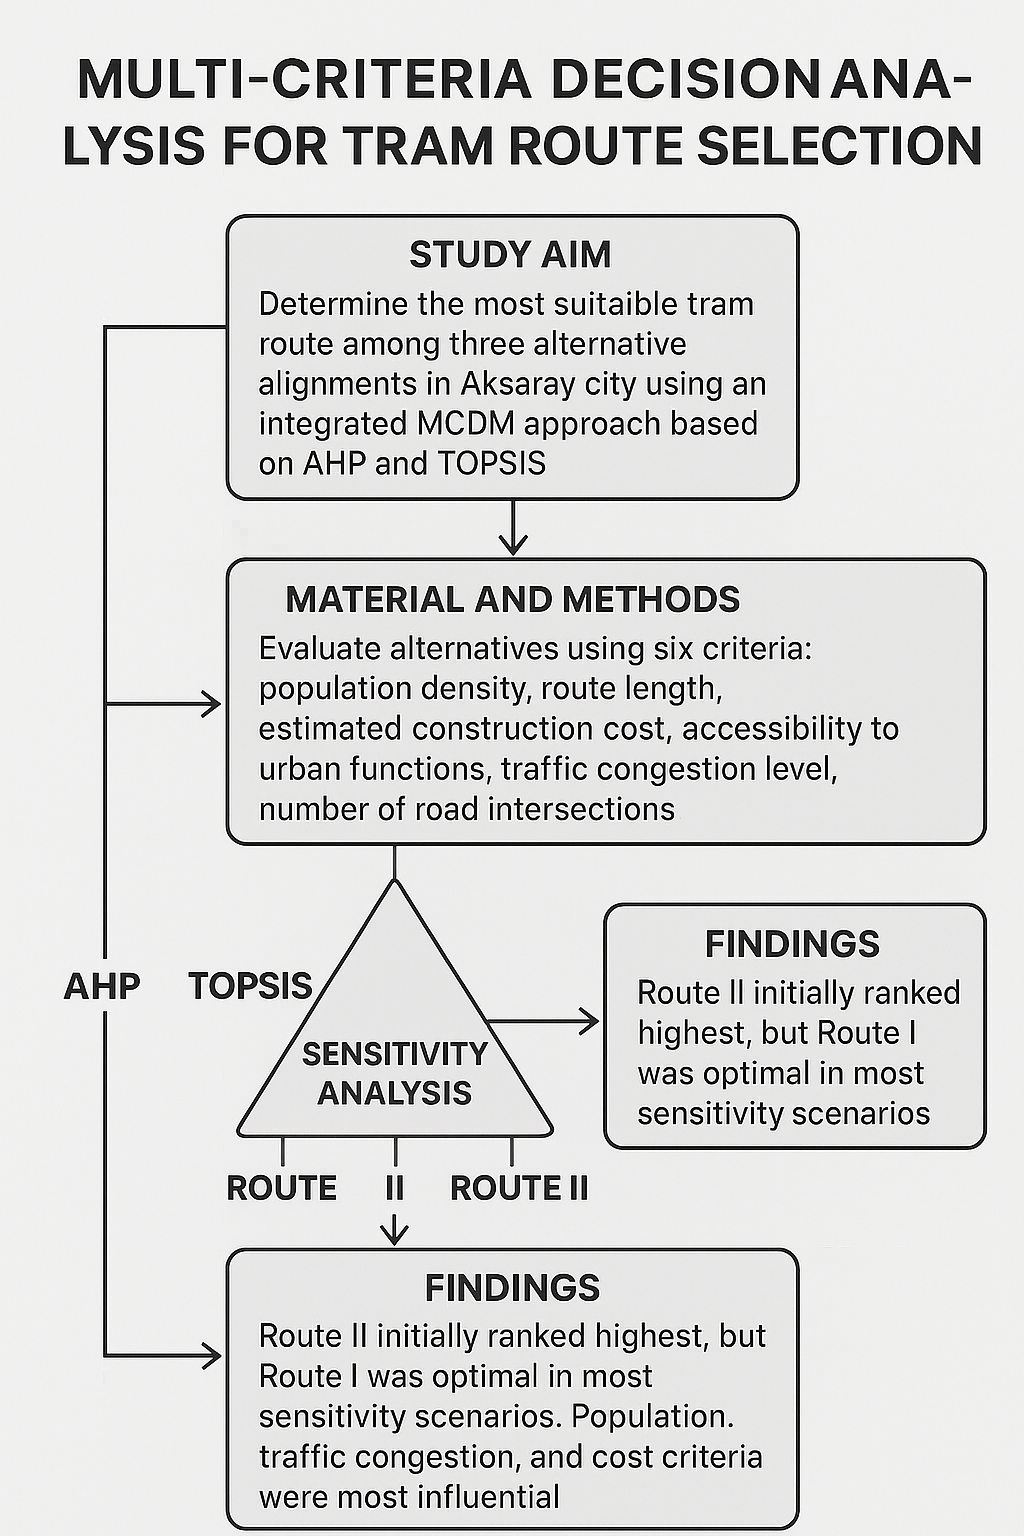

Supplement: Supplementary file 1 [file 0616b8f3fd4cb741bcdc871c.docx]
